# Supplementary material for: Altered Clock Gene Expression in Female APP/PS1 Mice and Aquaporin-Dependent Amyloid Accumulation in the Retina
Source: MDPI journal article supplement (doi:10.3390/ijms242115679), 2023-10-27
Supplement: s1 [file s1]

Supplementary Table S1. Real-time PCR oligonucleotides.

| Gene         | Sequence (5'>3')       |                       |
|--------------|------------------------|-----------------------|
|              | Forward                | Reverse               |
| <i>Clock</i> | ccttgcgctctgtgggtgtt   | tgcatcttctccaccaatcca |
| <i>Arntl</i> | cgctctacctgttcaagaaaa  | tcaccgatttccccgttc    |
| <i>Per1</i>  | aaacggcaagcggatgg      | gccatacagtgaggacgaaa  |
| <i>Per2</i>  | cagaggagaagactccgcac   | ttgctgctgctggatgatgt  |
| <i>Per3</i>  | acgaagctctcgaatccct    | gaatctgacggcgagtggt   |
| <i>Cry1</i>  | cggtagaggaagtccgggtg   | tgaagaactgaccaagcggg  |
| <i>Cry2</i>  | tgaagaactgaccaagcggg   | gttggtgattggcttctctgc |
| <i>Hprt</i>  | gttggcttacctcaactgct   | taatcacgacgctgggactg  |
| <i>AQP0</i>  | cgtgctctgcatctttgcta   | accctccccacagtctcttt  |
| <i>Aqp1</i>  | tcccctaacttccccttg     | agcacagggacaattccaag  |
| <i>Aqp3</i>  | cttgtgatgttggtgtgg     | aagccaagttgatggtgagg  |
| <i>Aqp4</i>  | ttccgttcgatcttcagagg   | tatcagcccatttcccagag  |
| <i>Aqp5</i>  | ttcaggaccatcccagaaag   | taagatggcactcgacgaac  |
| <i>AQP7</i>  | atatgtgctgggtcagttcctg | aatgtttgcagtggccttgg  |
| <i>Aqp8</i>  | ttgctacctggggaacatc    | caatcagccctccaaatagc  |
| <i>Aqp9</i>  | tgcgacttttggtgtctctg   | ttgaaccactccatccttc   |
| <i>AQP11</i> | ctgctggctgcactcatc     | ttgagaaatacaggctac    |
| <i>Gs</i>    | actgtgagcccaagtgtgtg   | ggaggtacatgtcgtgttg   |
| <i>Glast</i> | gagcctcaccaaggaagatg   | cctcccggtagctcatttta  |

HPRT: hypoxanthine-guanine phosphoribosyltransferase; AQP: aquaporin.

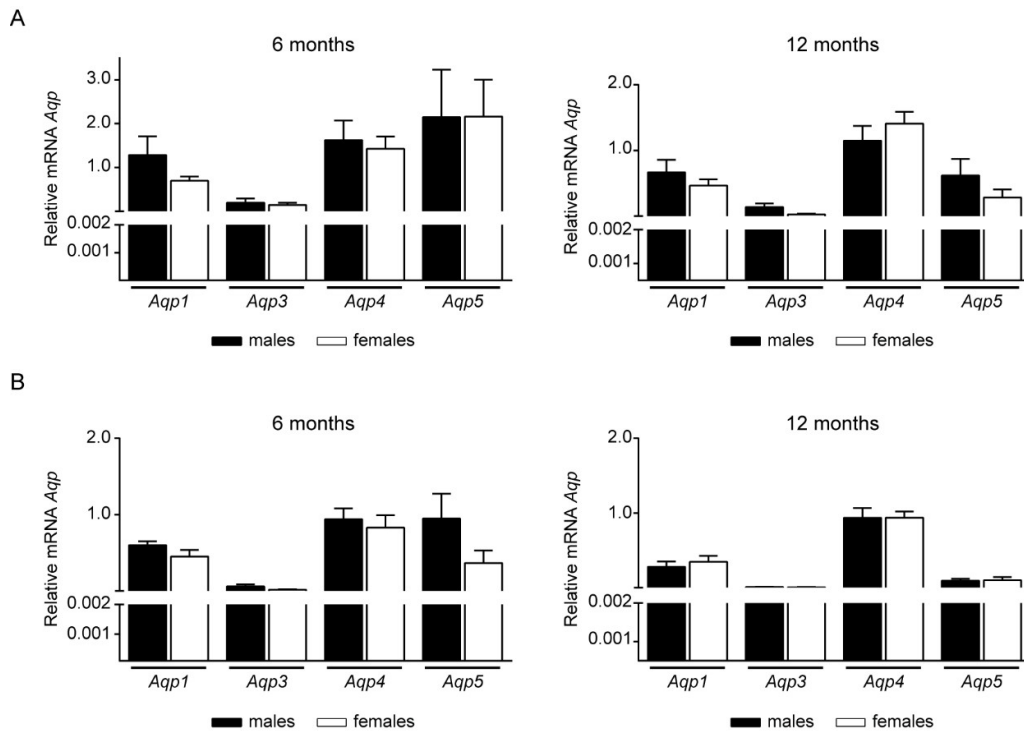

**Supplementary Figure S1.** RT-PCR analysis of the differential gene expression of *Aqps* in retinal samples derived from 6- and 12-month-old female and male APP/PS1 (**A**) and wt (**B**) mice. Data expressed as media  $\pm$  SEM. \*  $p < 0.05$ , \*\*\*  $p < 0.001$ ,  $n = 12$  (6 male and 6 female) mice per group, using two-way ANOVA and Bonferroni's multiple comparison post-test. wt: wild type.
